# Supplementary material
Source: ML conference proceedings conference paper supplement (https://openreview.net/forum?id=i2r7LDjba3)

Condition ECG Signal

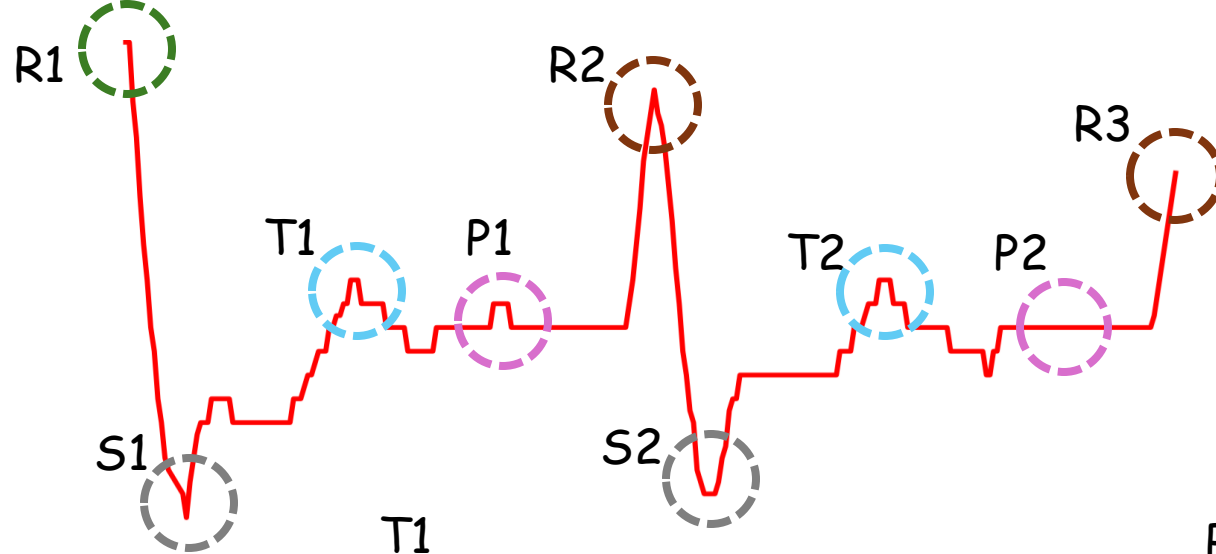

R : R Wave (ED)  
T : T Wave (ES)  
P : P Wave  
S : S Wave

Condition Image

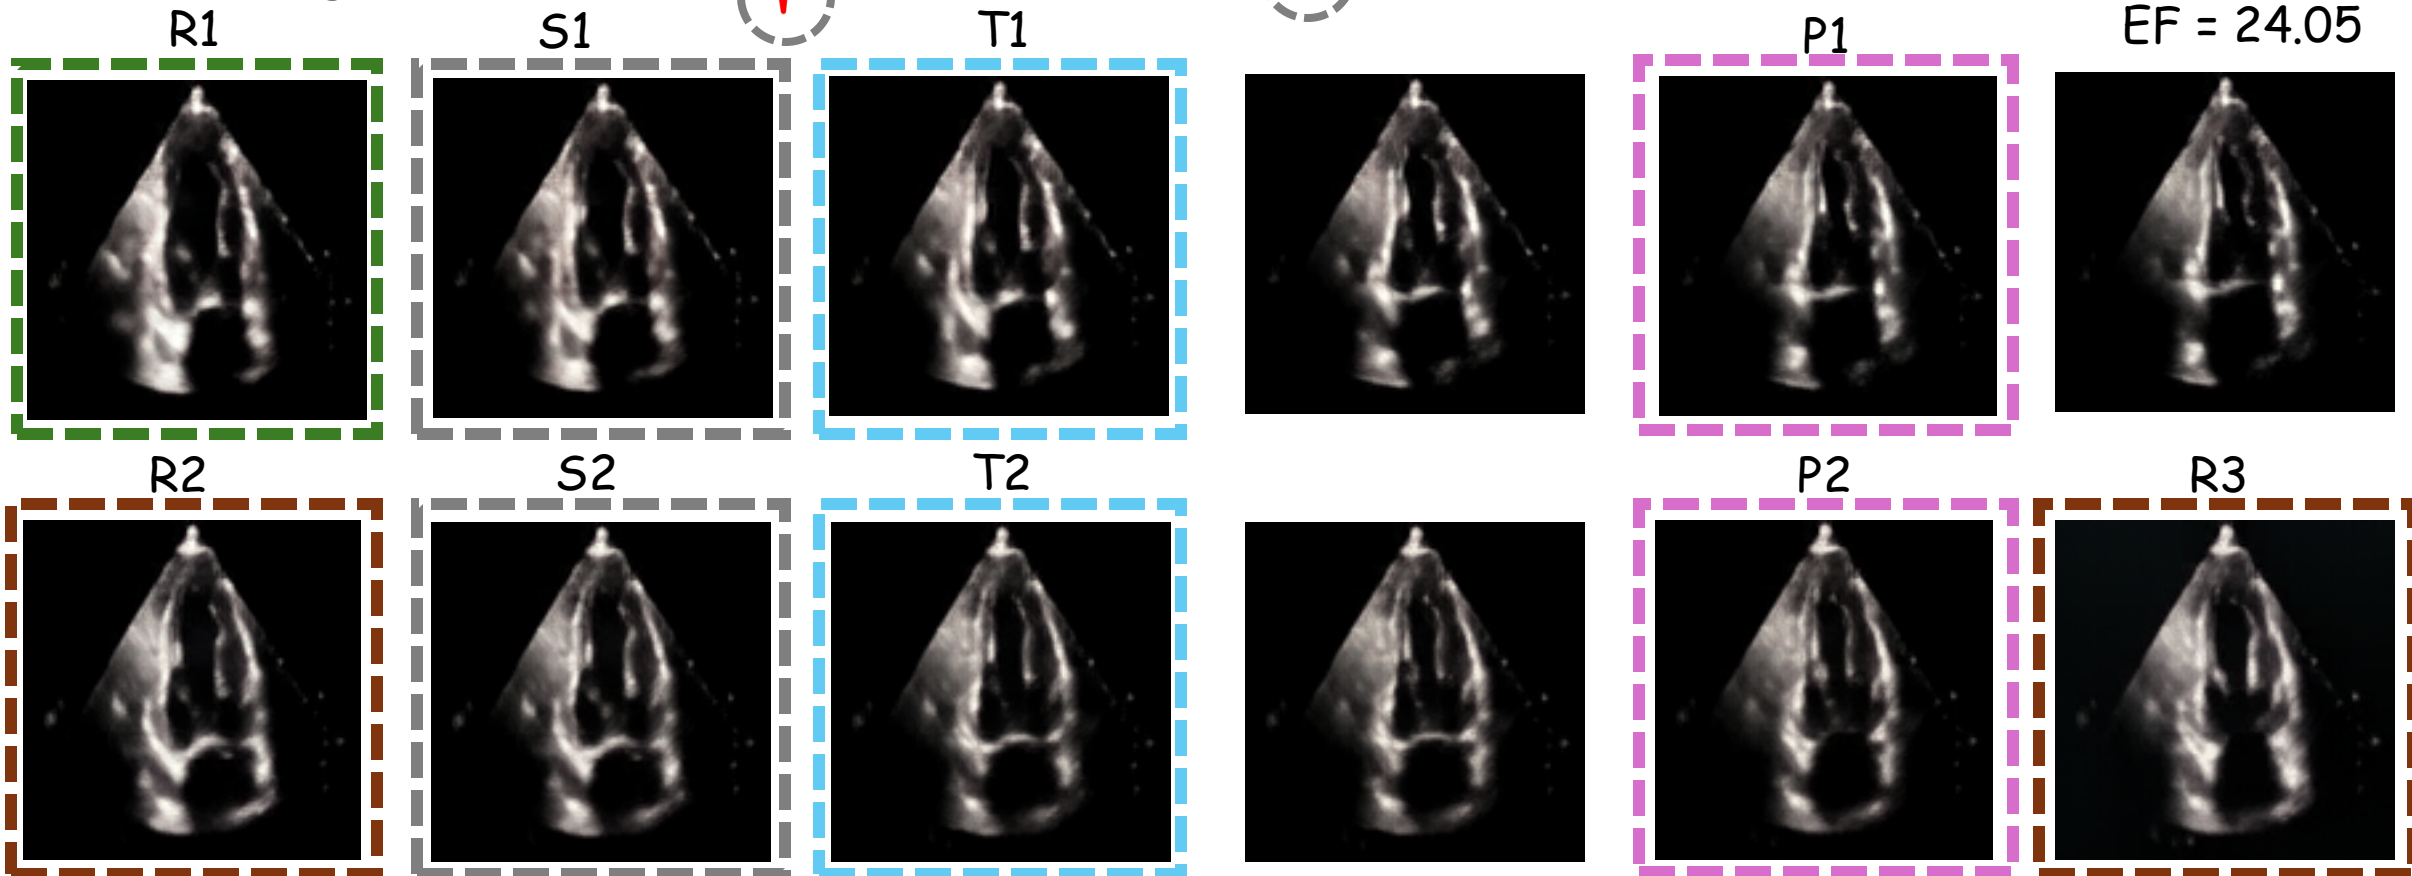

Supplement: supplementary_material [file attachment]

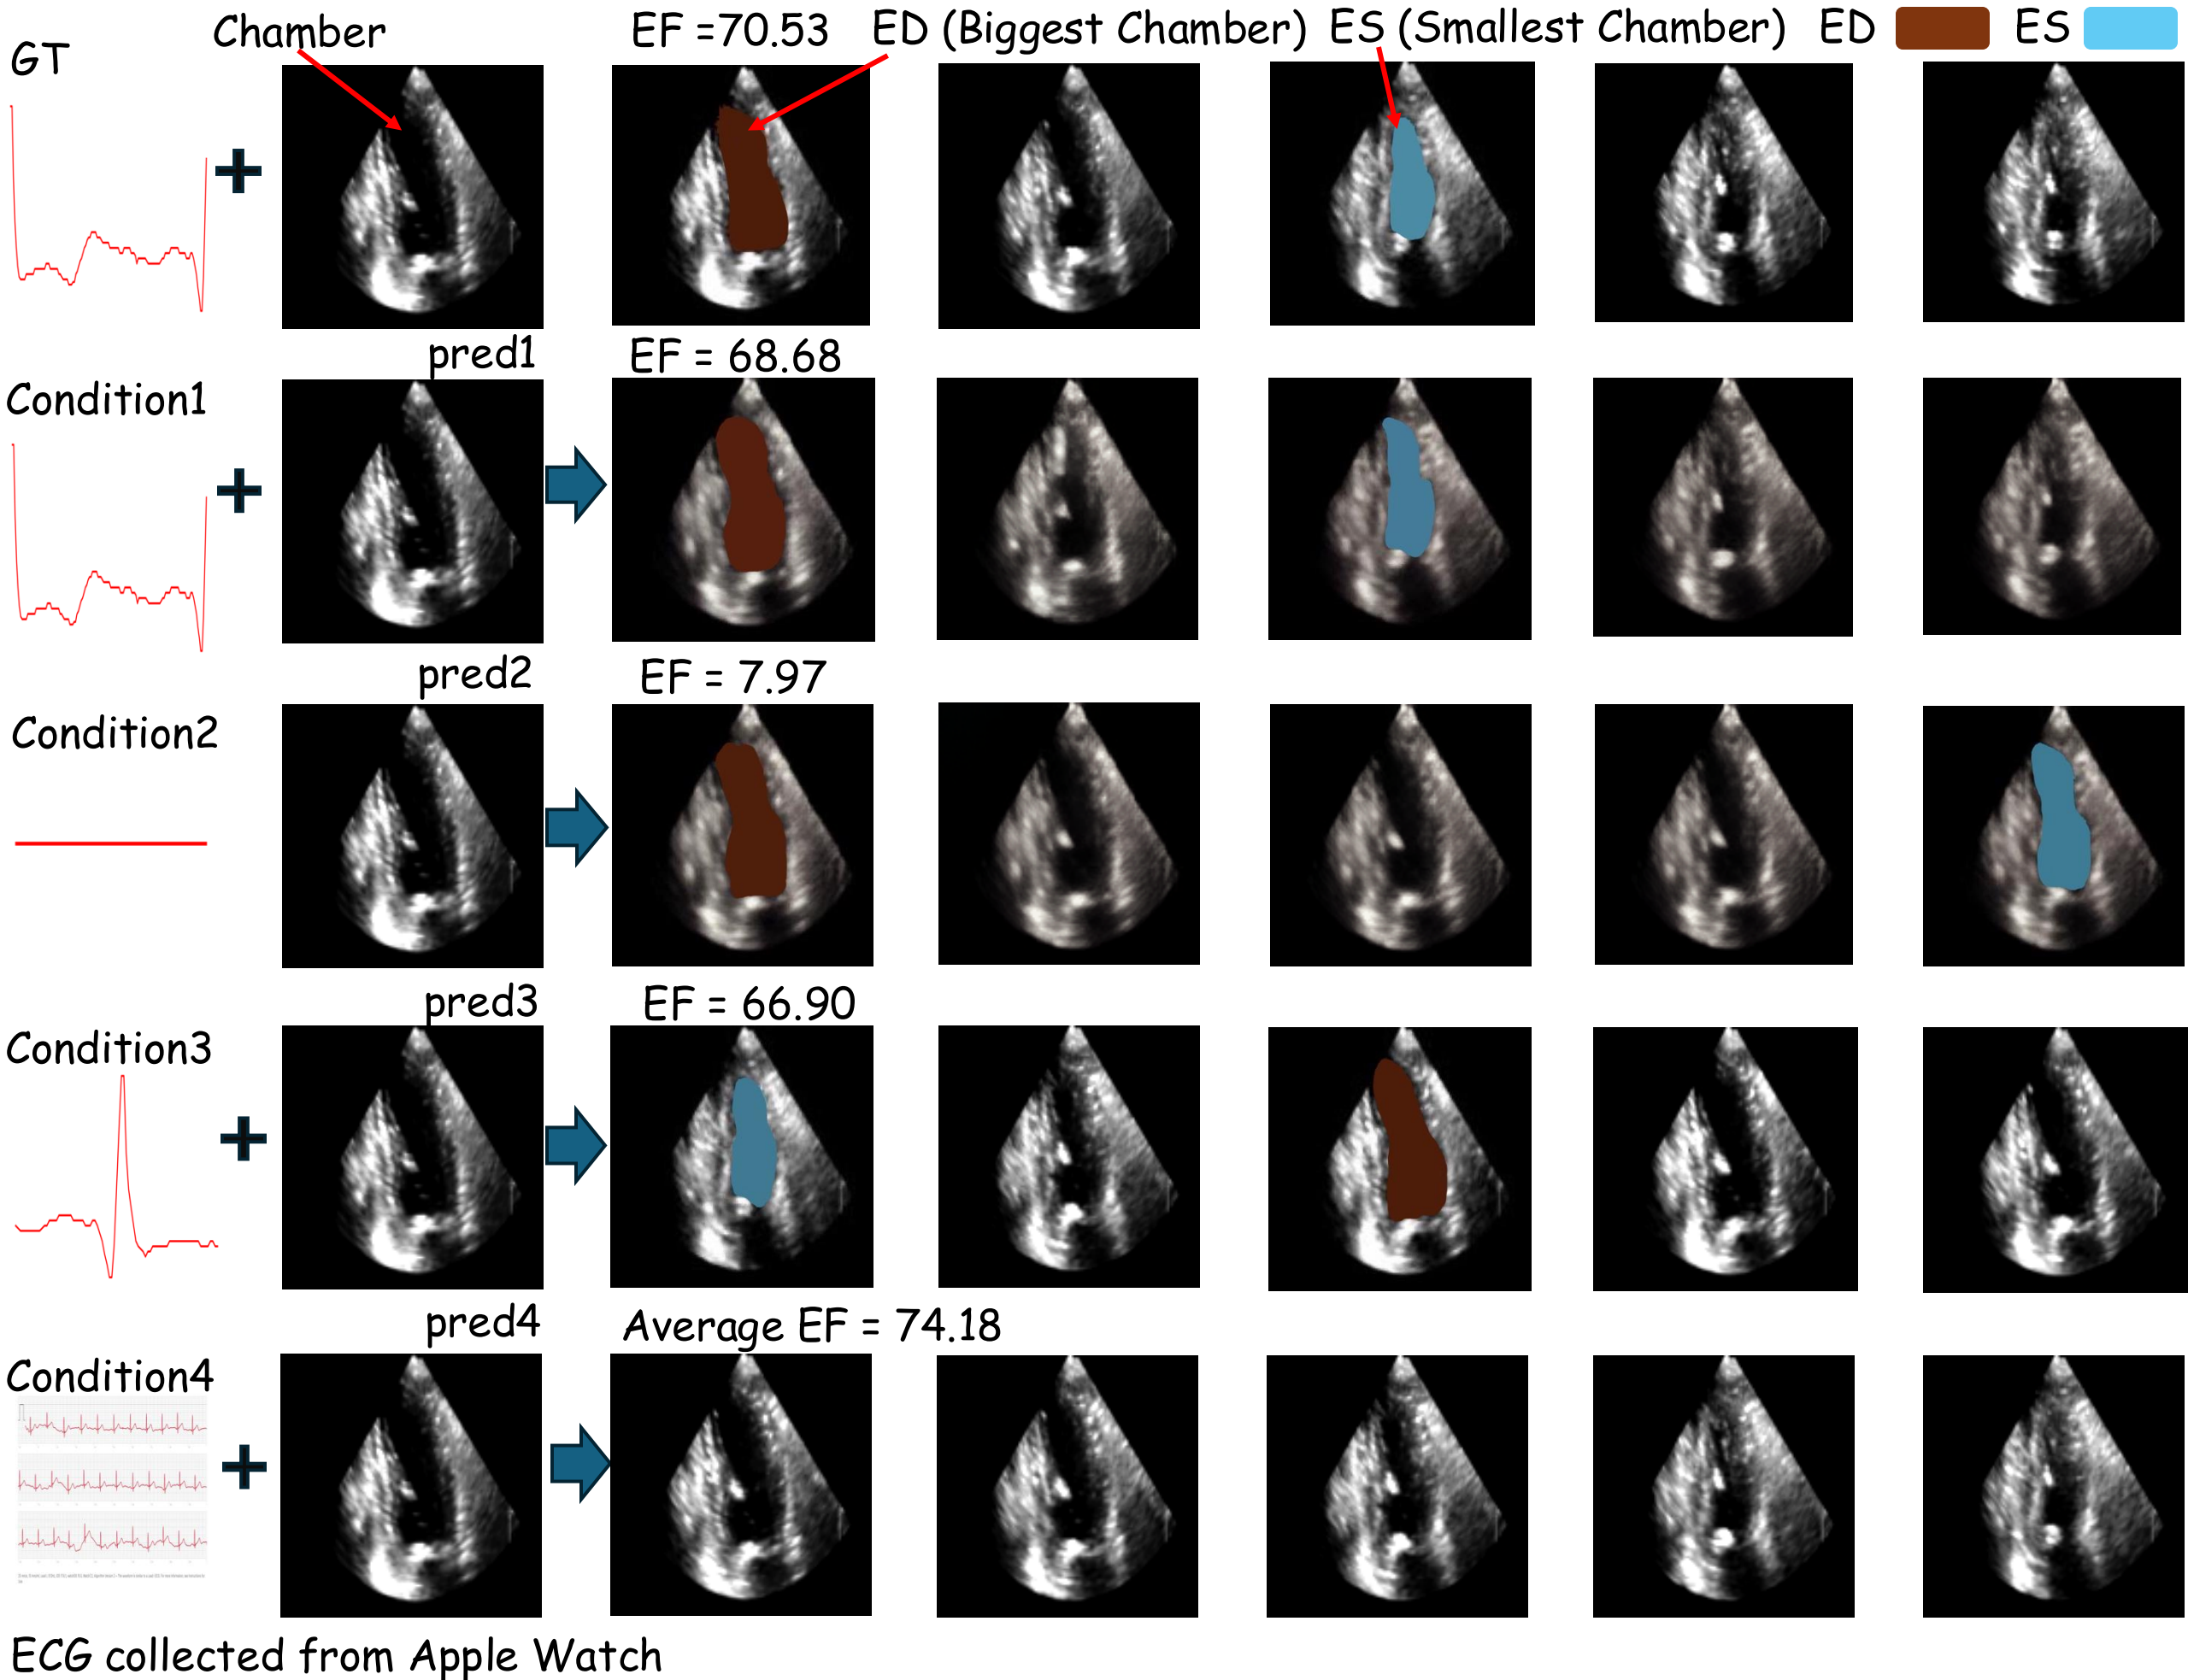

Supplement: supplementary_material [file attachment]
